# Supplementary material for: An extreme event of sea-level rise along the Northeast coast of North America in 2009–2010
Source: Springer Nature journal article supplement (doi:10.1038/ncomms7346), 2015-02-24
Supplement: 41467_2015_BFncomms7346_MOESM938_ESM.pdf [file 41467_2015_BFncomms7346_MOESM938_ESM.pdf]

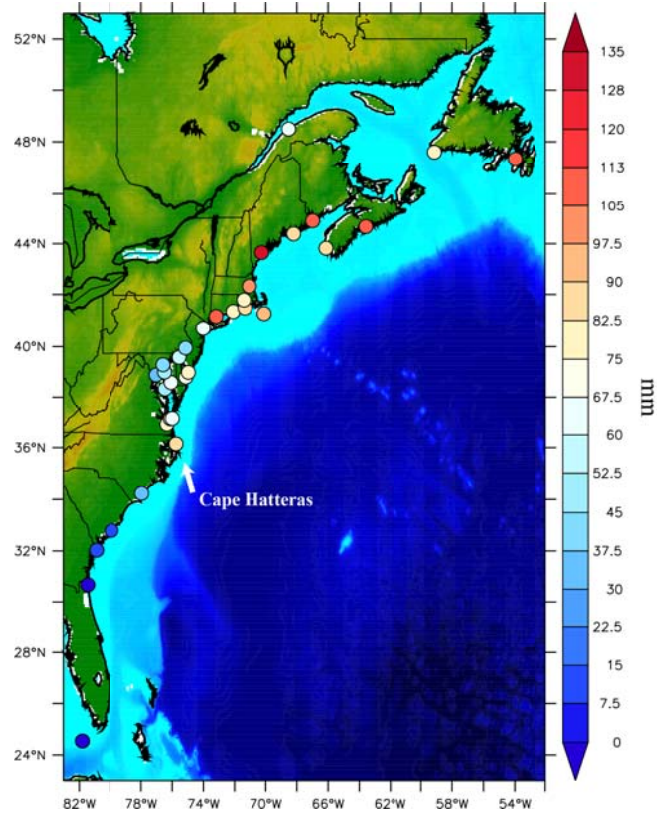

**Supplementary Figure 1. Total coastal SLR over 2008-2010 from TG stations.** The separation at New York City is evident. The sea level jump is large (relatively small) north (south) of New York City.

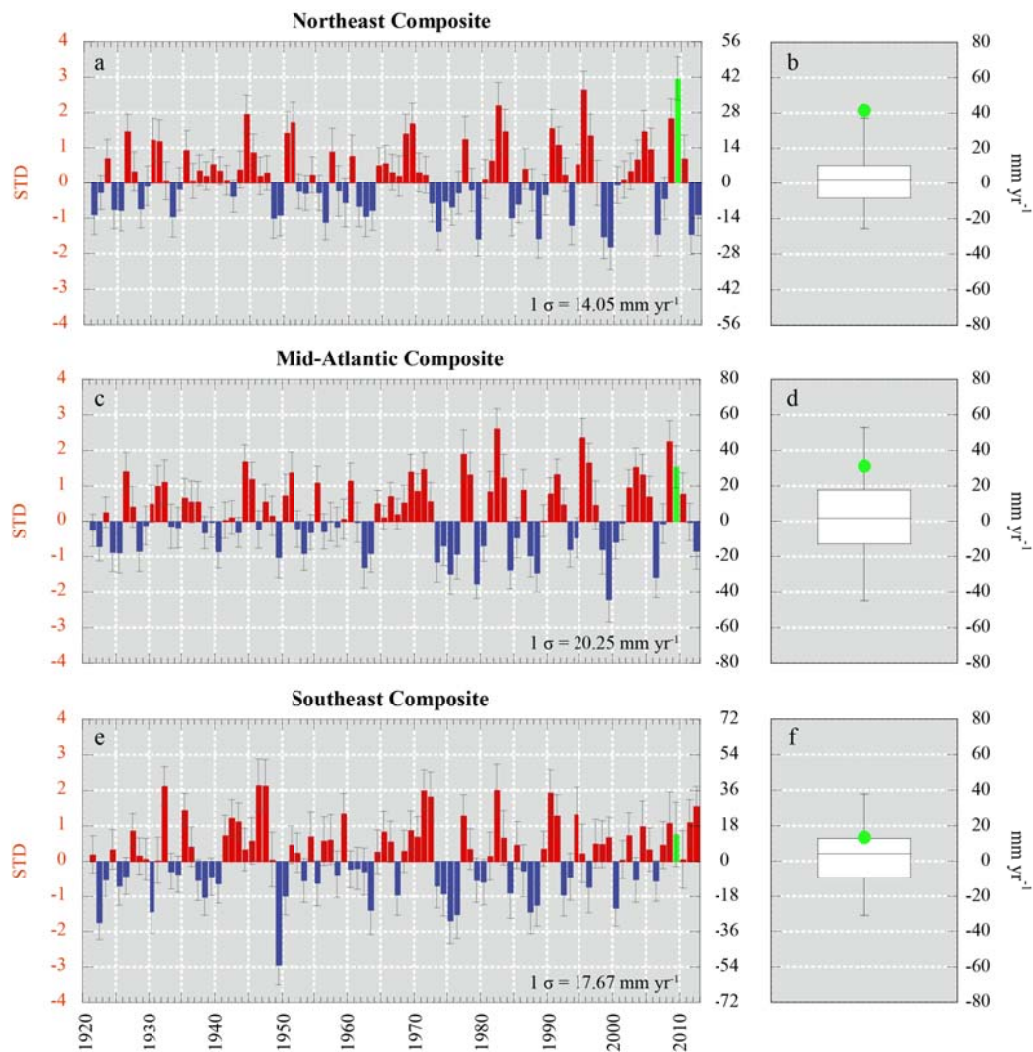

**Supplementary Figure 2. Yearly SLR rate based on linear fits to the monthly data on interannual time scale (36 months). a., c. and e.** Time series of the yearly SLR rates ( $\text{mm yr}^{-1}$ ). The absolute and relative (to  $1\sigma$ ) rates are shown by the right and left y-axis, respectively. The rate is centered about the year of interest. Rates are calculated only if all 36-month data are available. **b., d. and f.** Box and whisker plots indicate the position of the 2009 SLR rate for the Northeast, Mid-Atlantic and Southeast SLR regions. The 2009 SLR rates are depicted by green bars and dots.

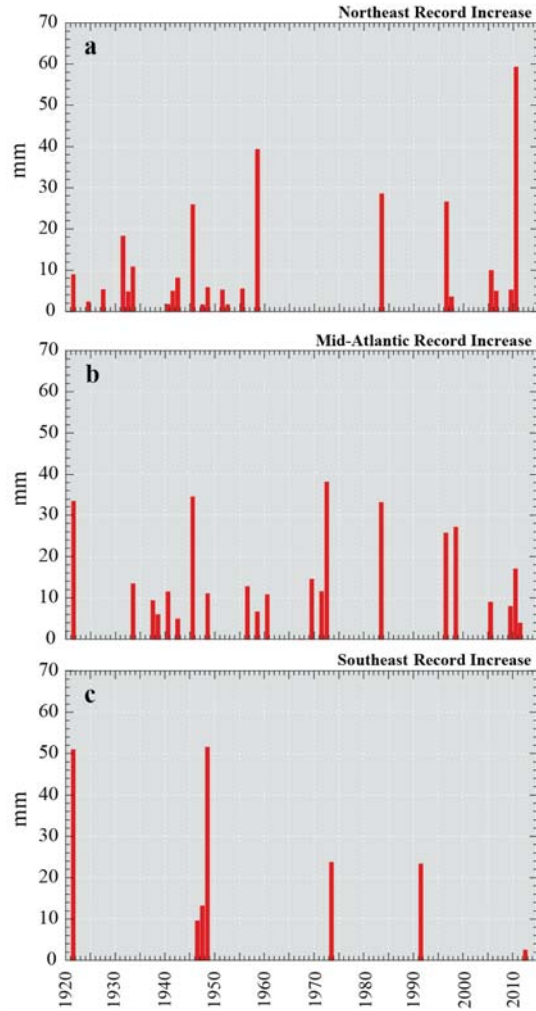

**Supplementary Figure 3. Years with record high sea levels in the three SLR regimes.** The values show the sea level increase over the previous record sea level (mm).

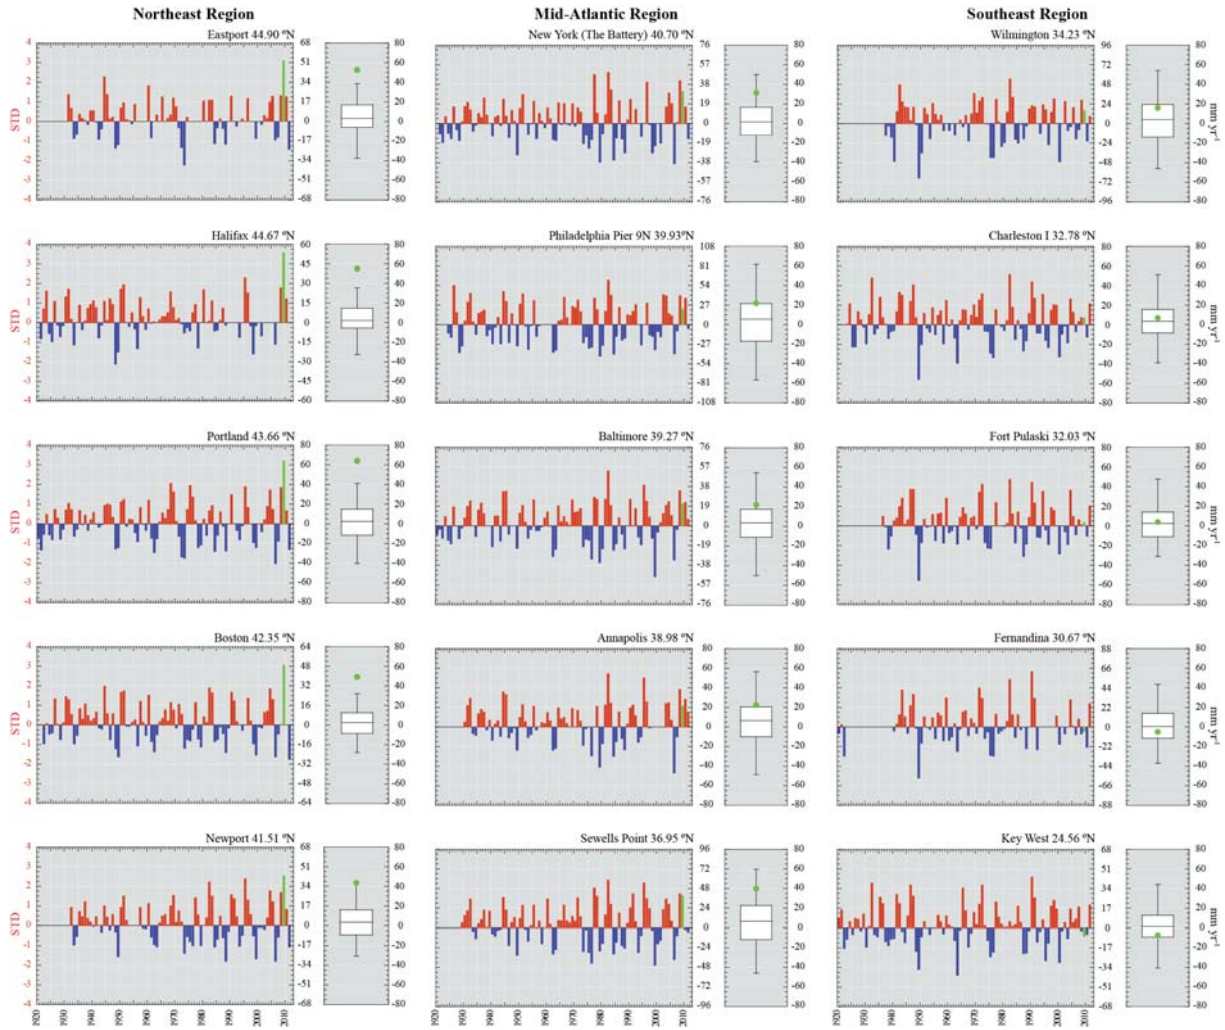

**Supplementary Figure 4. Individual TG station records from the three SLR regimes.** The left, middle and right columns contains records for TG stations locations in the Northeast, Mid-Atlantic and Southeast regions, respectively. The absolute and relative (to  $1\sigma$ ) rates are shown by the right and left y-axis, respectively. Each box plot represents the median, upper and low quartile, minimum and maximum values that fall within an acceptable range given a TG record, and outliers that do not fall within this acceptable range. Specifically, an outlier is a point whose value is greater (less) than the upper (lower) quartile plus (minus) 1.5 times the interquartile distance (the distance between the upper and lower quartiles). The 2009 data are depicted by green bars and dots.

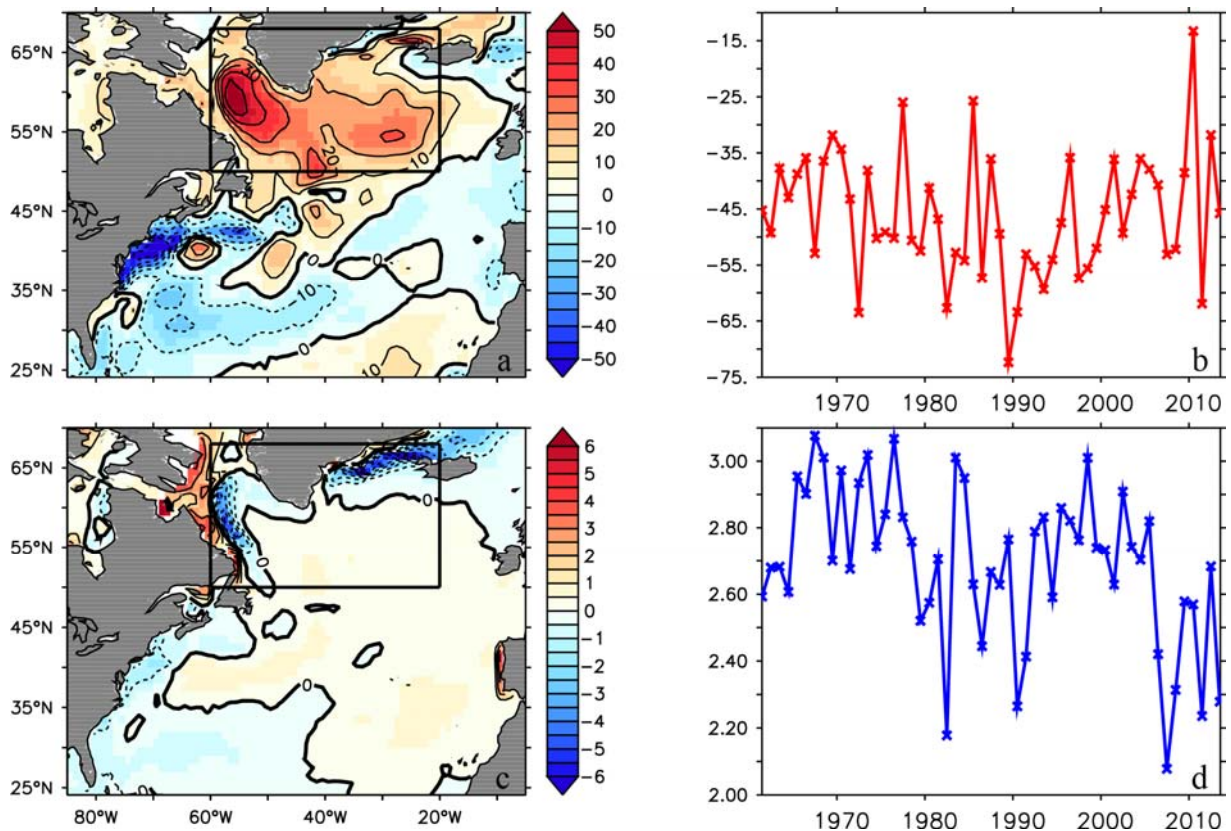

**Supplementary Figure 5. Heat and freshwater flux anomalies in 2009-10 relative to 1961-2013. a.** Heat flux anomalies (contour interval - 10  $\text{W m}^{-2}$ ). **b.** Time series of the mean heat flux within the black box from 1961 – 2013 ( $\text{W m}^{-2}$ ). **c.** Freshwater flux anomalies (contour interval -  $2 \times 10^8 \text{ m s}^{-1}$ ). **d.** Time series of the mean freshwater flux within the black box ( $10^8 \text{ m s}^{-1}$ ). The data are from the GFDL ODA.

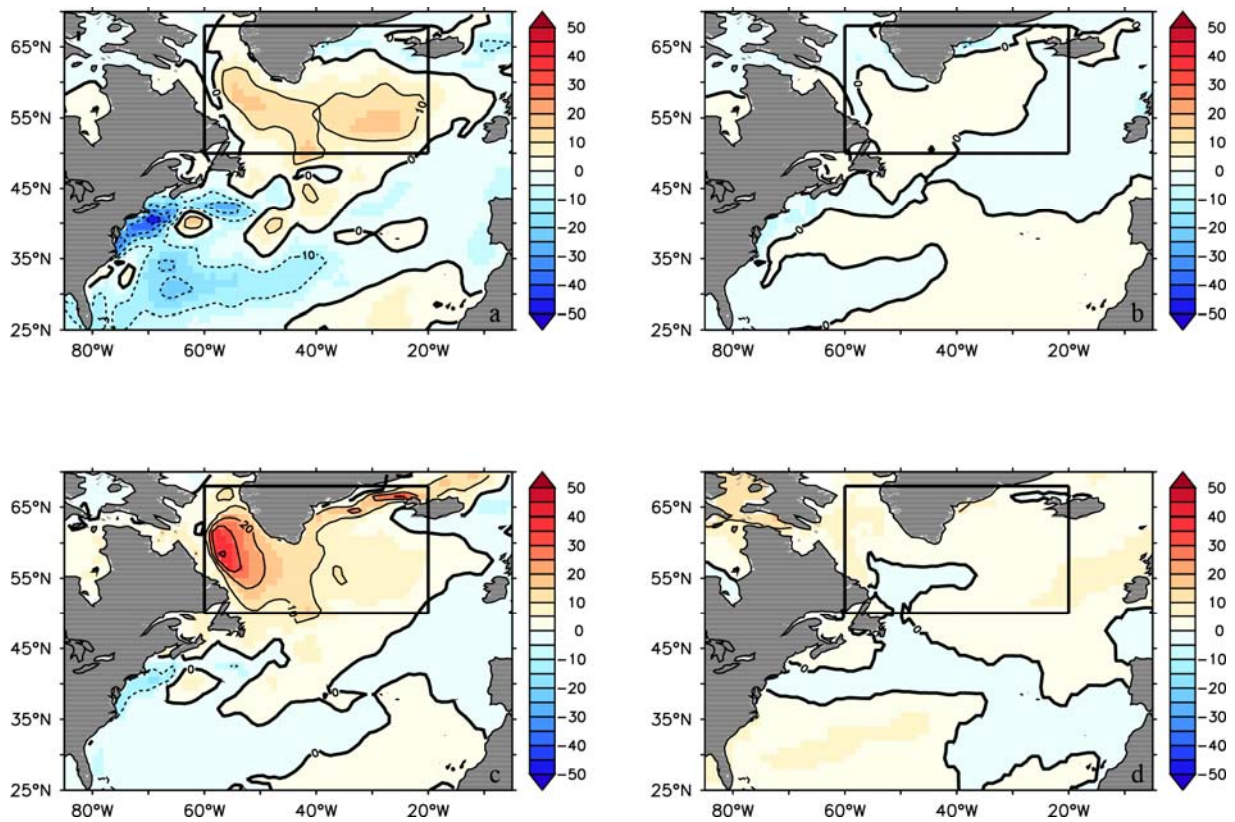

**Supplementary Figure 6. Components of the heat flux anomalies ( $\text{W m}^{-2}$ ) in 2009-10 relative to 1961 – 2013. a.** Latent heat flux anomaly into the ocean (contour interval -  $10 \text{ W m}^{-2}$ ). **b.** Longwave heat flux anomaly into the ocean. **c.** Sensible heat flux anomaly into the ocean. **d.** Shortwave heat flux anomaly into the ocean. The data are from the GFDL ODA.

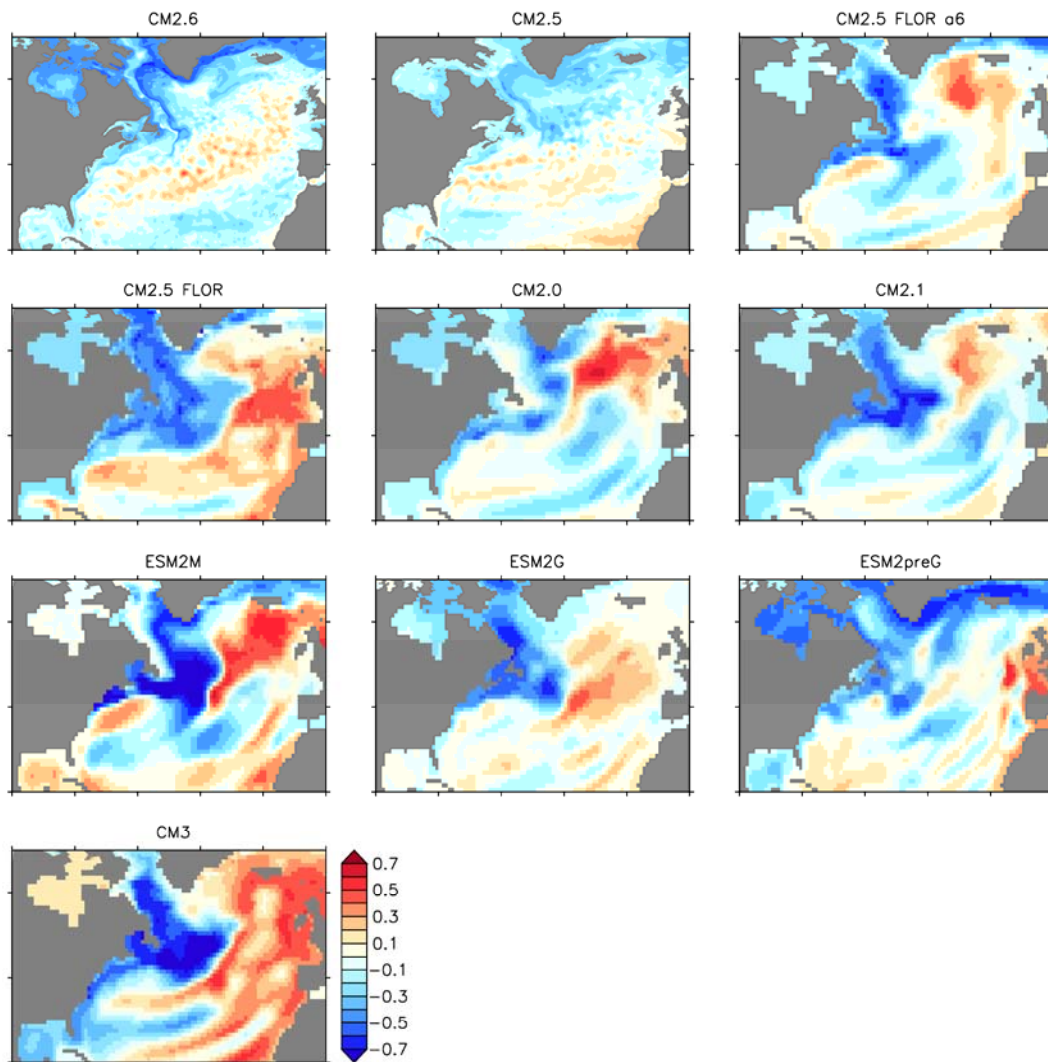

**Supplementary Figure 7. Correlation between the annual mean DSL and AMOC data in the control runs of 10 GFDL models.** All control runs are 100-year long except CM2.6 (80-year long). The AMOC index is defined as the maximum overturning streamfunction at 45°N in the North Atlantic.

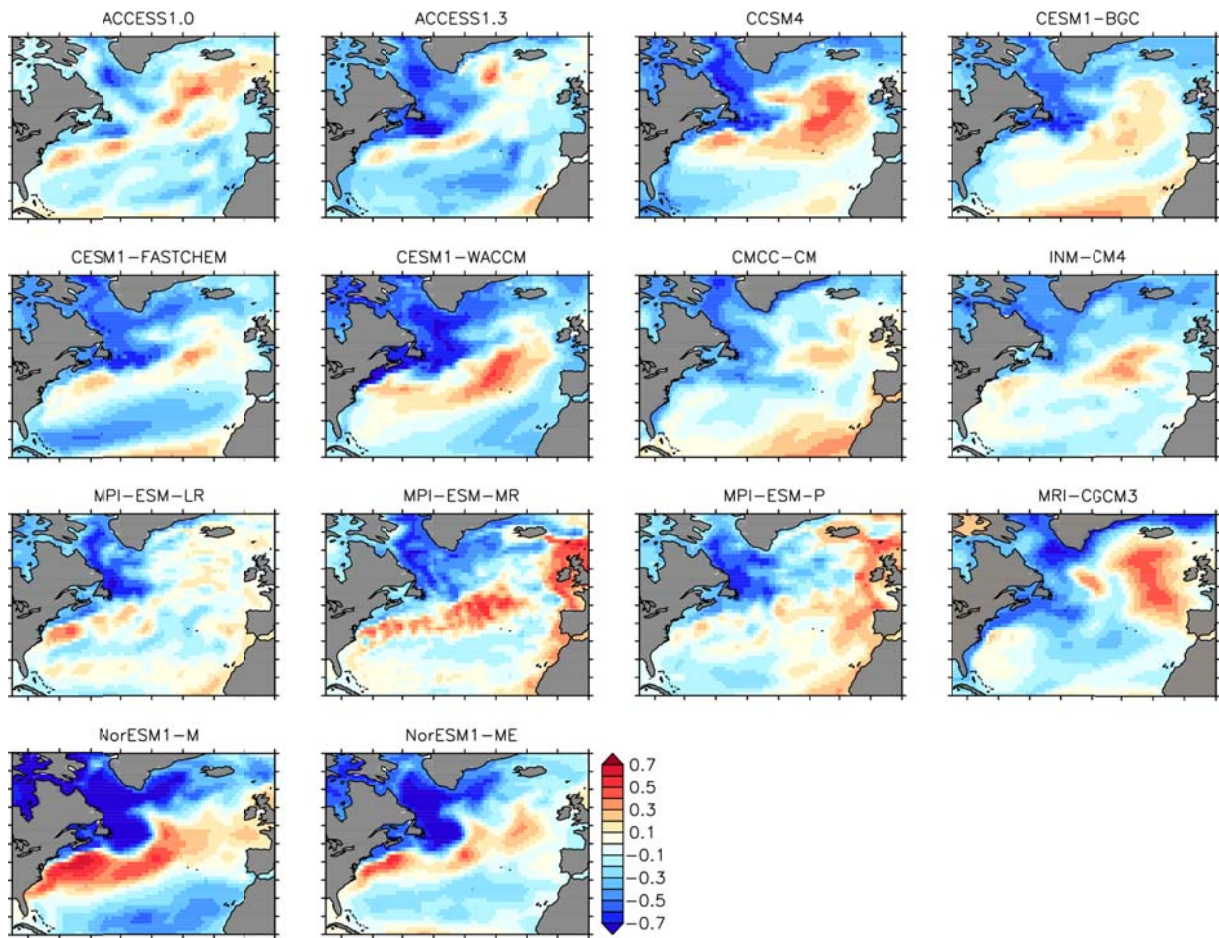

**Supplementary Figure 8. Correlation between the annual mean DSL and AMOC data in the control runs of 14 CMIP5 models. All control runs are 100-year long.**



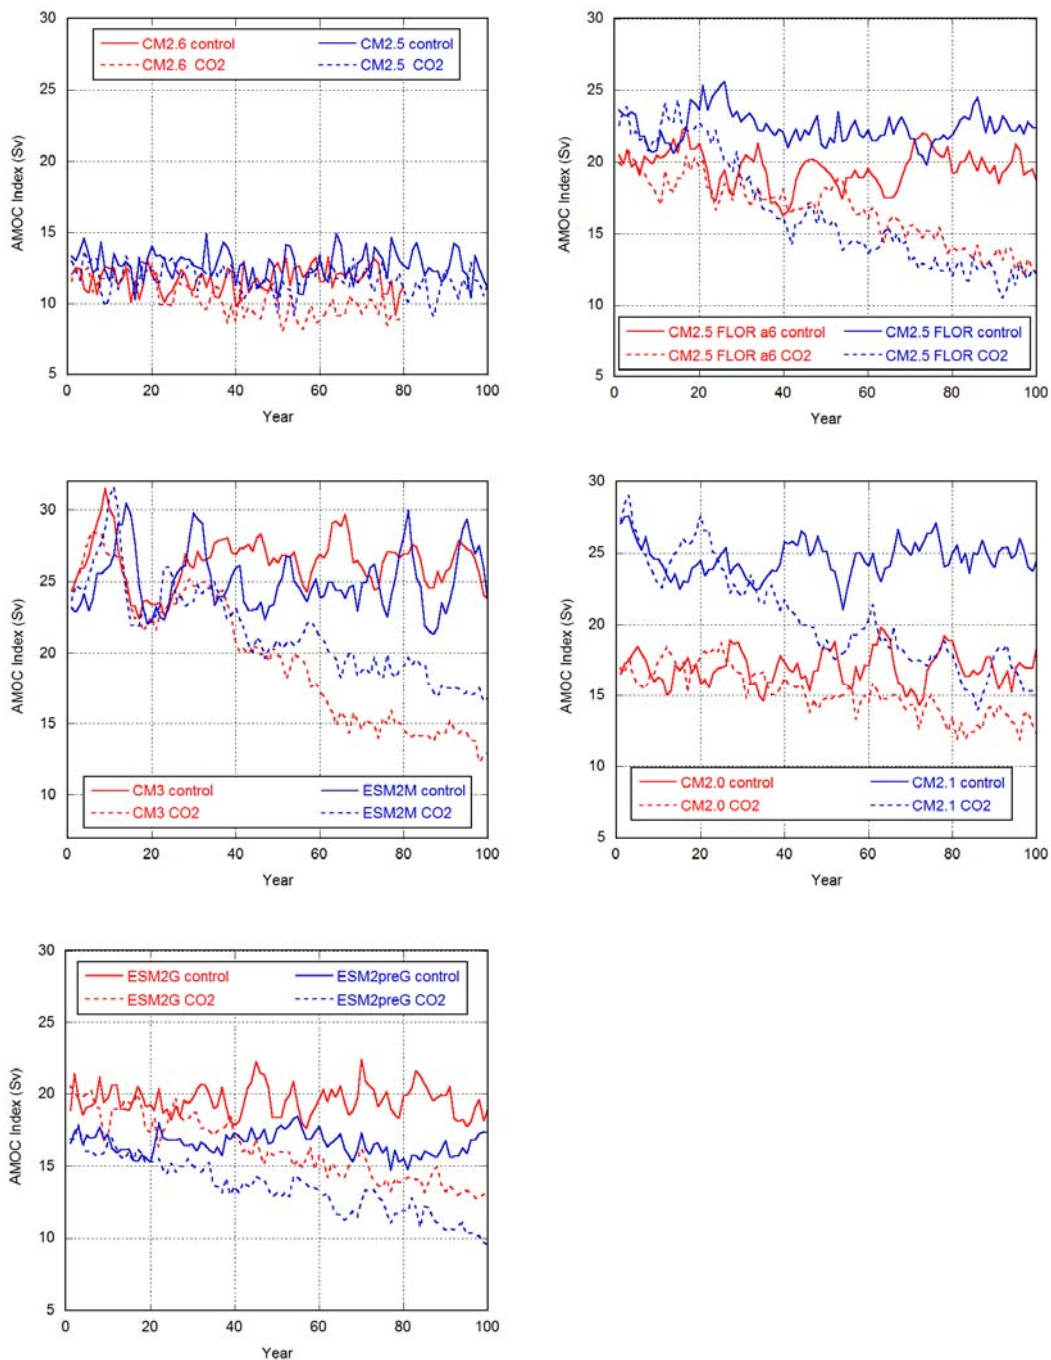

**Supplementary Figure 9. Time series of the AMOC index (45°N) in the control runs and 1% yr<sup>-1</sup> CO<sub>2</sub> experiments of the 10 GFDL models.**

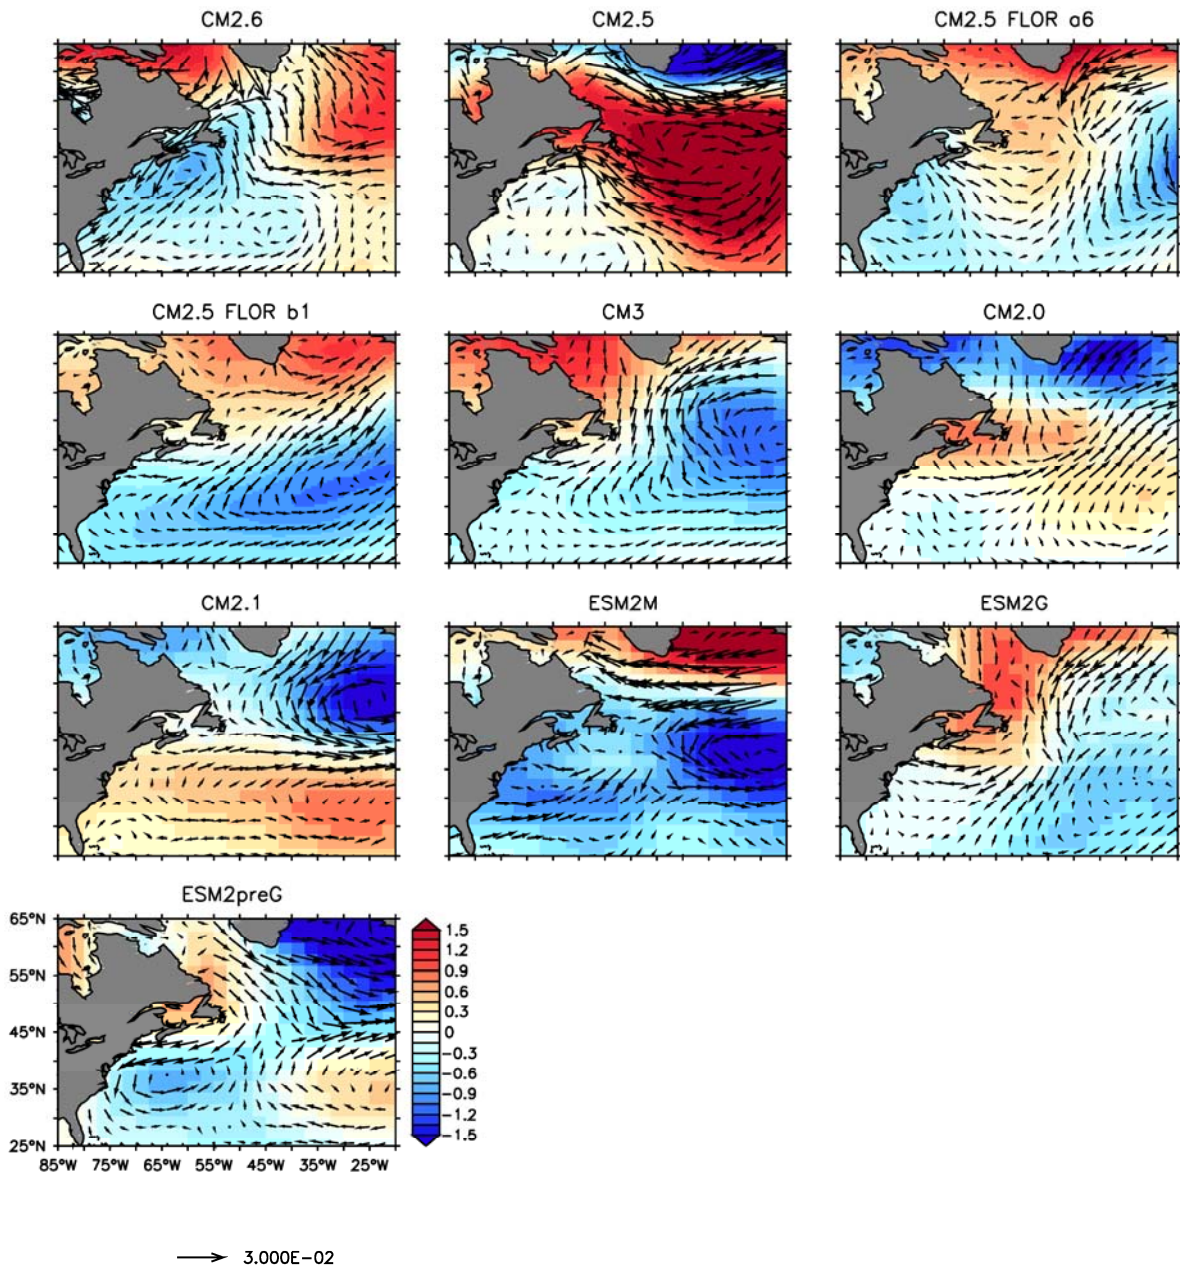

**Supplementary Figure 10. Wind stress and sea level pressure anomaly patterns during coastal extreme SLR events in the control runs of 10 GFDL models.** This figure shows the mean difference of sea level pressure (hPa) and wind stress ( $\text{N m}^{-2}$ ) between the years in which the yearly SLR rates near Boston are greater than  $20 \text{ mm yr}^{-1}$  versus less than  $-20 \text{ mm yr}^{-1}$ .

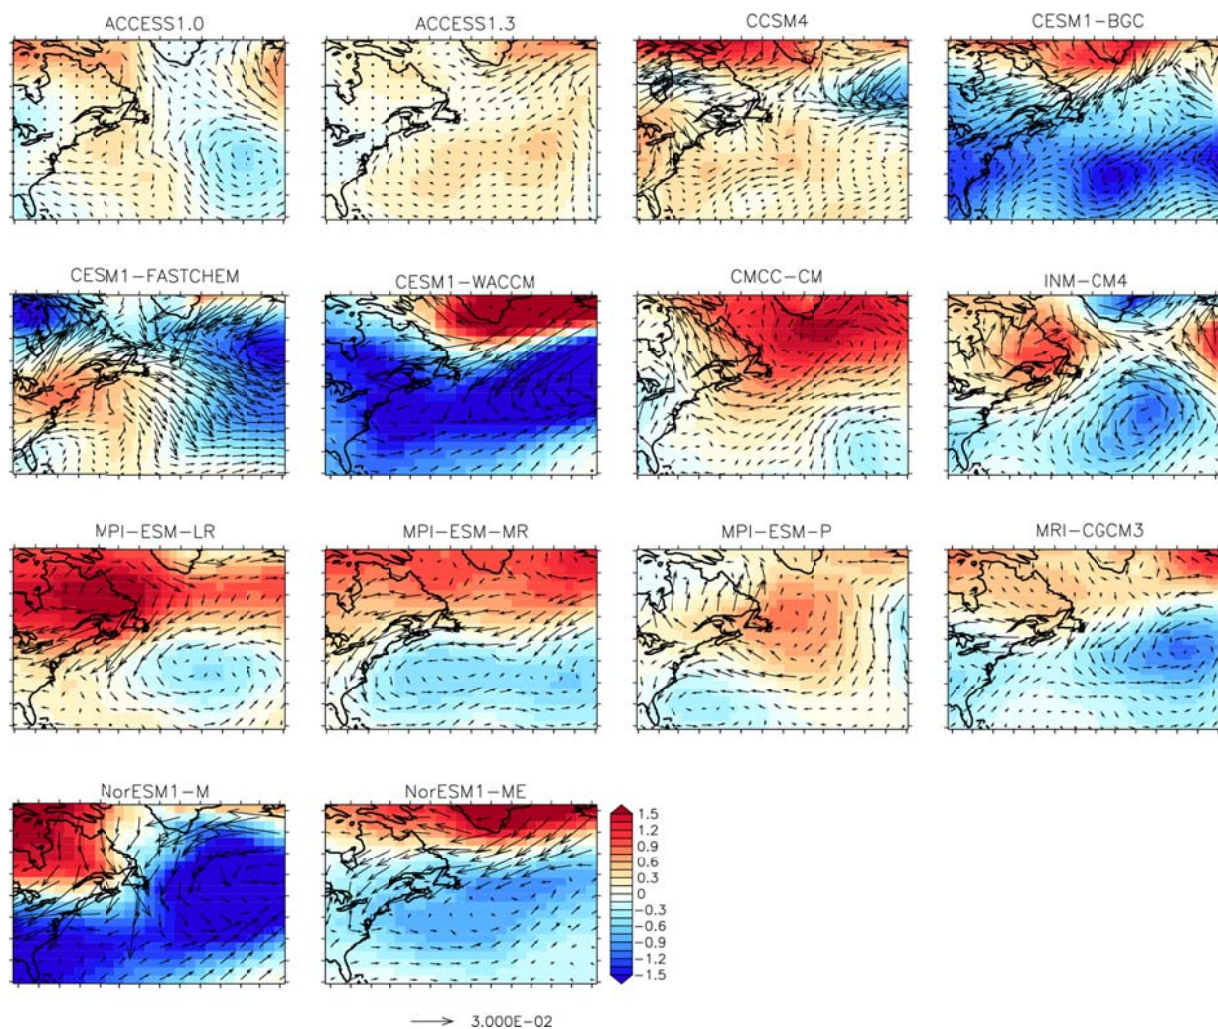

**Supplementary Figure 11. Wind stress and sea level pressure anomaly patterns during coastal extreme SLR events in the control runs of 14 CMIP5 models.** This figure shows the mean difference of sea level pressure (hPa) and wind stress ( $\text{N m}^{-2}$ ) between the years in which the yearly SLR rates near Boston are greater than  $20 \text{ mm yr}^{-1}$  versus less than  $-20 \text{ mm yr}^{-1}$ .

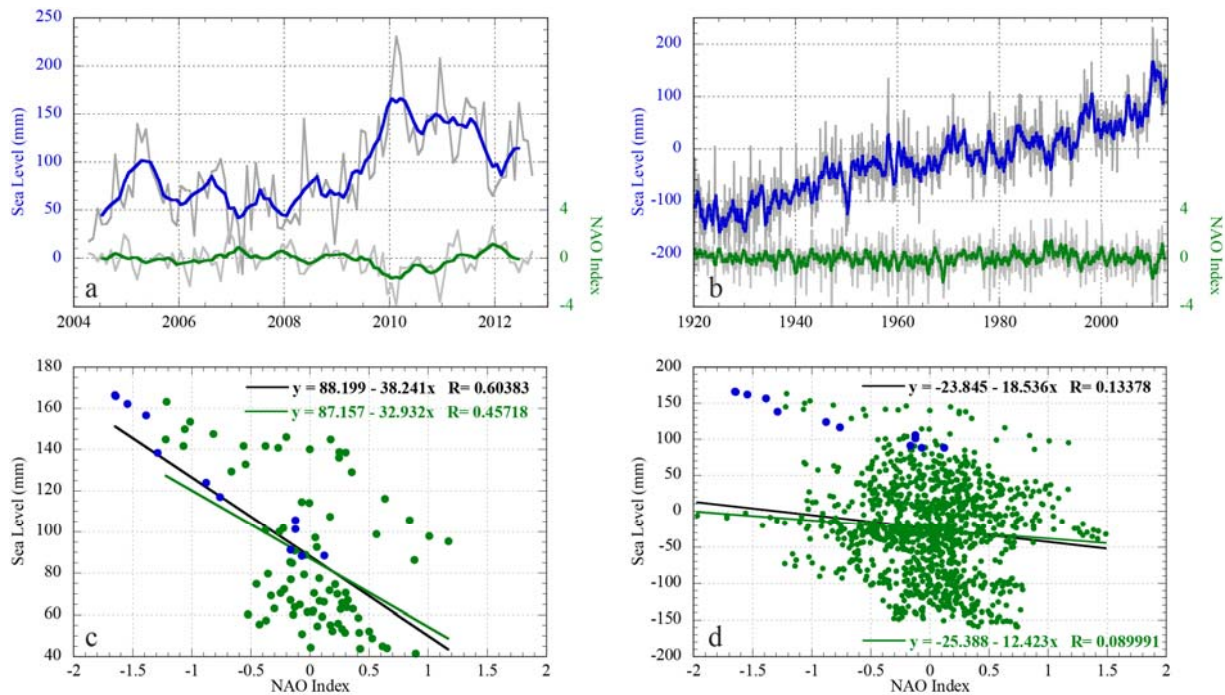

**Supplementary Figure 12. Correlation between the NAO index and the Northeast sea level composite.** **a.** The time series of the NE sea level composite (monthly gray, filtered blue) and the NAO index (monthly light gray, filtered green). The seasonal cycle has been removed from the NE composite and a 6-month filter applied to both time series. **b.** Same as **a.** but for a much longer time period (January 1920-September 2012). **c.** The monthly correlation and regression between the NAO index and NE sea level composite. The blue points highlight the correlation during the 30% AMOC downturn period. The green trend line is calculated from the green points only which are the months not associated with the 30% downturn period of the AMOC. The black trend line is calculated from all points (April 2004-September 2012). **d.** Same as **c.** but for a much longer time period (January 1920-September 2012). The sea level data are from PSMSL. The NAO index data are obtained from the NCAR Climate Analysis Section (<https://climatedataguide.ucar.edu/climate-data/hurrell-north-atlantic-oscillation-nao-index-station-based>).

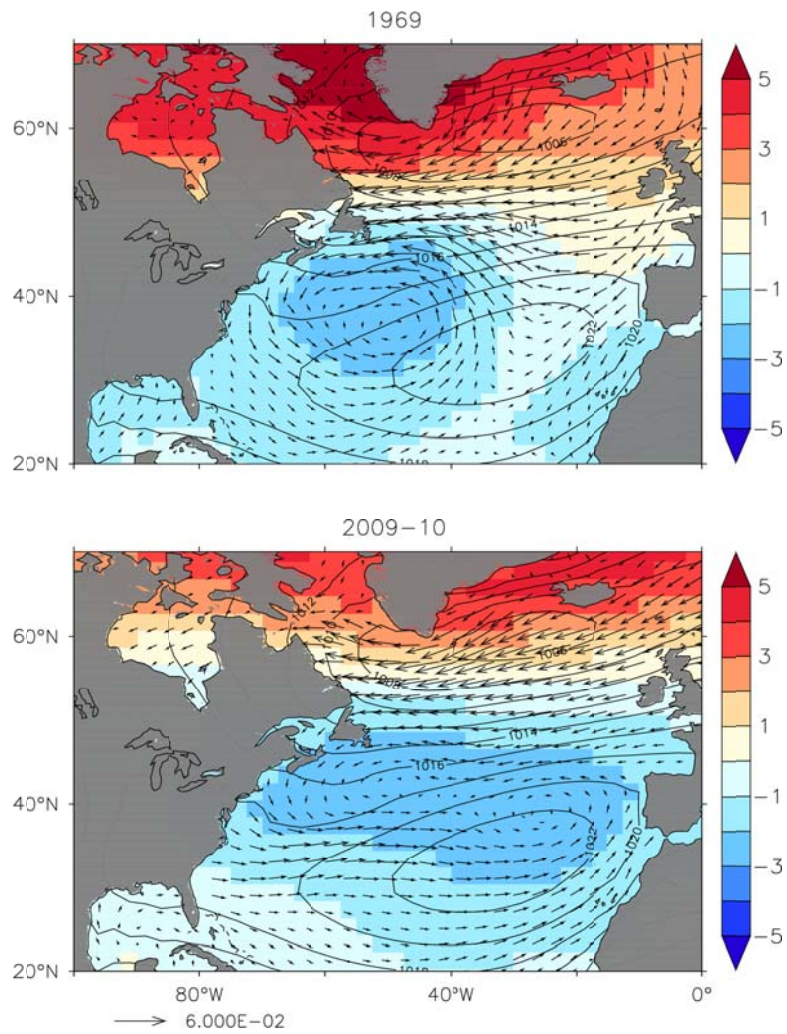

**Supplementary Figure 13. Two periods with extreme negative NAO index: 1969 and 2009-10.** Shading and vectors show the sea level pressure anomalies (hPa) and the wind stress anomalies (N m<sup>-2</sup>), respectively. Contours indicate sea level pressure climatology (hPa).

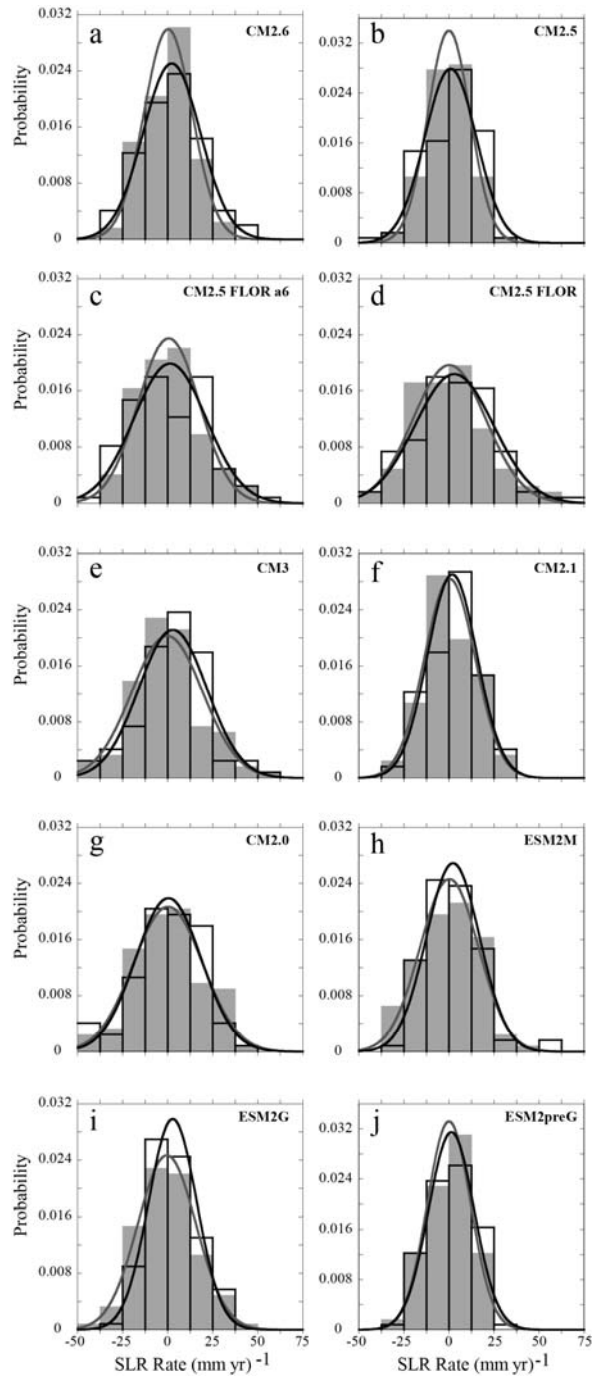

**Supplementary Figure 14. Distribution of the yearly SLR rates in the simulations of the 10 GFDL models.** The values show the composite SLR rates along the Northeast Coast of North America. The yearly SLR rates are calculated based on both the DSL changes and the global ocean thermal expansion. All runs are 100-year long except CM2.6 (80-year long). Shading and gray – control runs; thick black lines – CO<sub>2</sub> experiments. Fits are from Gaussian distribution.

**Supplementary Table 1.** TG data in three SLR regimes used in the present study.

| <b>Station Name</b>  | <b>Latitude (°N)</b> | <b>Longitude (°W)</b> | <b>Record Span Used</b> | <b>Completeness</b> |
|----------------------|----------------------|-----------------------|-------------------------|---------------------|
| Key West             | 24.56                | 81.81                 | 1920-2012               | 99%                 |
| Fernandia            | 30.67                | 81.47                 | 1920-2012               | 77%                 |
| Fort Pulaski         | 32.03                | 80.90                 | 1935-2012               | 97%                 |
| Charleston 1         | 32.78                | 79.93                 | 1922-2012               | 100%                |
| Springmaid Pier      | 33.66                | 78.92                 | 1978-2012               | 71%                 |
| Wilmington           | 34.23                | 77.95                 | 1936-2012               | 96%                 |
| Duck Pier Outside    | 36.18                | 75.75                 | 1985-2011               | 93%                 |
| Sewells Point        | 36.95                | 76.33                 | 1928-2012               | 100%                |
| Chesapeake Bay       | 36.97                | 76.11                 | 1985-2012               | 100%                |
| Kiptopeke            | 37.17                | 75.99                 | 1952-2012               | 97%                 |
| Solomon's Island     | 38.32                | 76.45                 | 1938-2012               | 95%                 |
| Cambridge II         | 38.57                | 76.07                 | 1971-2012               | 95%                 |
| Lewes                | 38.78                | 75.12                 | 1920-2012               | 70%                 |
| Cape May             | 38.97                | 74.96                 | 1966-2012               | 89%                 |
| Annapolis            | 38.98                | 76.48                 | 1929-2012               | 94%                 |
| Baltimore            | 39.27                | 76.58                 | 1920-2012               | 99%                 |
| Atlantic City        | 39.36                | 74.42                 | 1920-2012               | 86%                 |
| Reedy Point          | 39.56                | 75.57                 | 1985-2012               | 79%                 |
| Philadelphia Pier 9N | 39.93                | 75.14                 | 1920-2012               | 95%                 |
| Sandy Hook           | 40.47                | 74.01                 | 1933-2011               | 96%                 |
| Bergen Point         | 40.64                | 74.14                 | 1985-2012               | 79%                 |
| New York (Battery)   | 40.70                | 74.01                 | 1920-2012               | 97%                 |
| Montauk              | 41.05                | 71.96                 | 1948-2012               | 83%                 |
| Bridgeport           | 41.17                | 73.18                 | 1965-2012               | 92%                 |
| Nantucket Island     | 41.29                | 70.10                 | 1965-2012               | 92%                 |
| New London           | 41.36                | 72.09                 | 1939-2012               | 93%                 |
| Newport              | 41.51                | 71.33                 | 1931-2012               | 98%                 |
| Woods Hole           | 41.52                | 70.67                 | 1933-2012               | 90%                 |
| Providence           | 41.81                | 71.40                 | 1939-2012               | 82%                 |
| Boston               | 42.35                | 71.05                 | 1921-2012               | 98%                 |
| Portland             | 43.66                | 70.25                 | 1920-2012               | 99%                 |
| Yarmouth             | 43.83                | 66.13                 | 1967-2012               | 71%                 |
| Bar Harbor           | 44.39                | 68.21                 | 1948-2012               | 85%                 |
| Halifax              | 44.67                | 63.58                 | 1920-2012               | 91%                 |
| Eastport             | 44.90                | 66.98                 | 1930-2012               | 87%                 |
| North Sydney         | 46.22                | 60.25                 | 1971-2012               | 88%                 |
| Charlottetown        | 46.23                | 63.12                 | 1971-2011               | 88%                 |
| Argentia             | 47.30                | 53.98                 | 1972-2012               | 70%                 |
| Port-Aux-Basques     | 47.57                | 59.13                 | 1959-2010               | 77%                 |
| Rimouski             | 48.48                | 68.52                 | 1985-2012               | 82%                 |
